# Supplementary material
Source: PubMed Central journal article supplement (PMC2690013)
Supplement: 0811476106_0811476106SI.pdf [file 0811476106_0811476106SI.pdf]

# Supporting Information

Chanderbali et al. 10.1073/pnas.0811476106

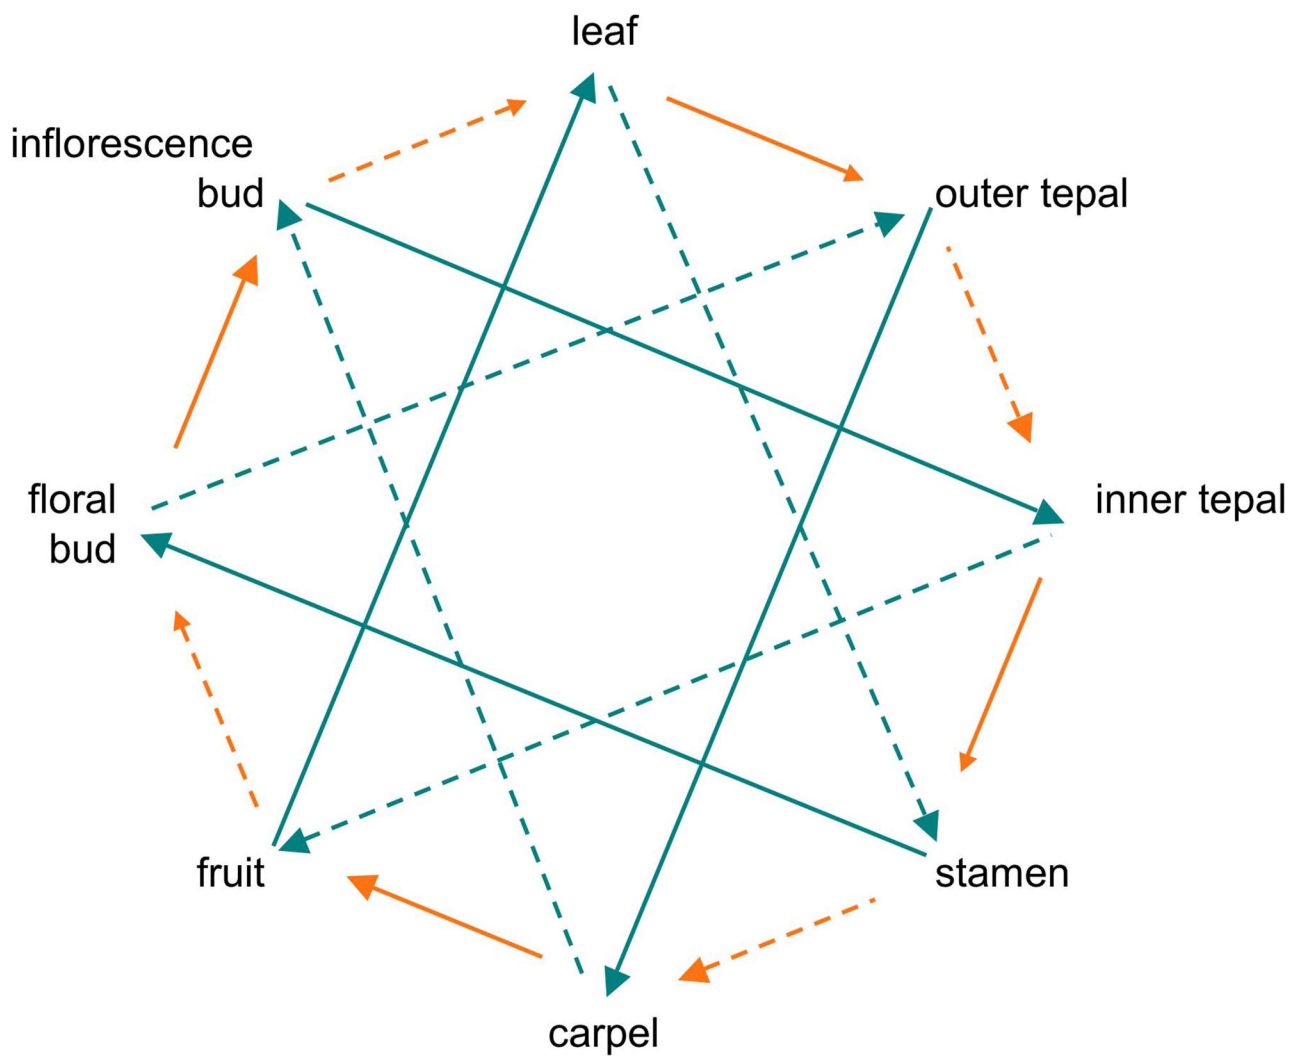

**Fig. S1.** Interwoven double-loop experimental design. Each arrow represents an array; orange and teal colors indicate separate biologic replicates, and solid and dashed lines indicate separate RNA extractions; point is labeled with Cy5, base with Cy3.

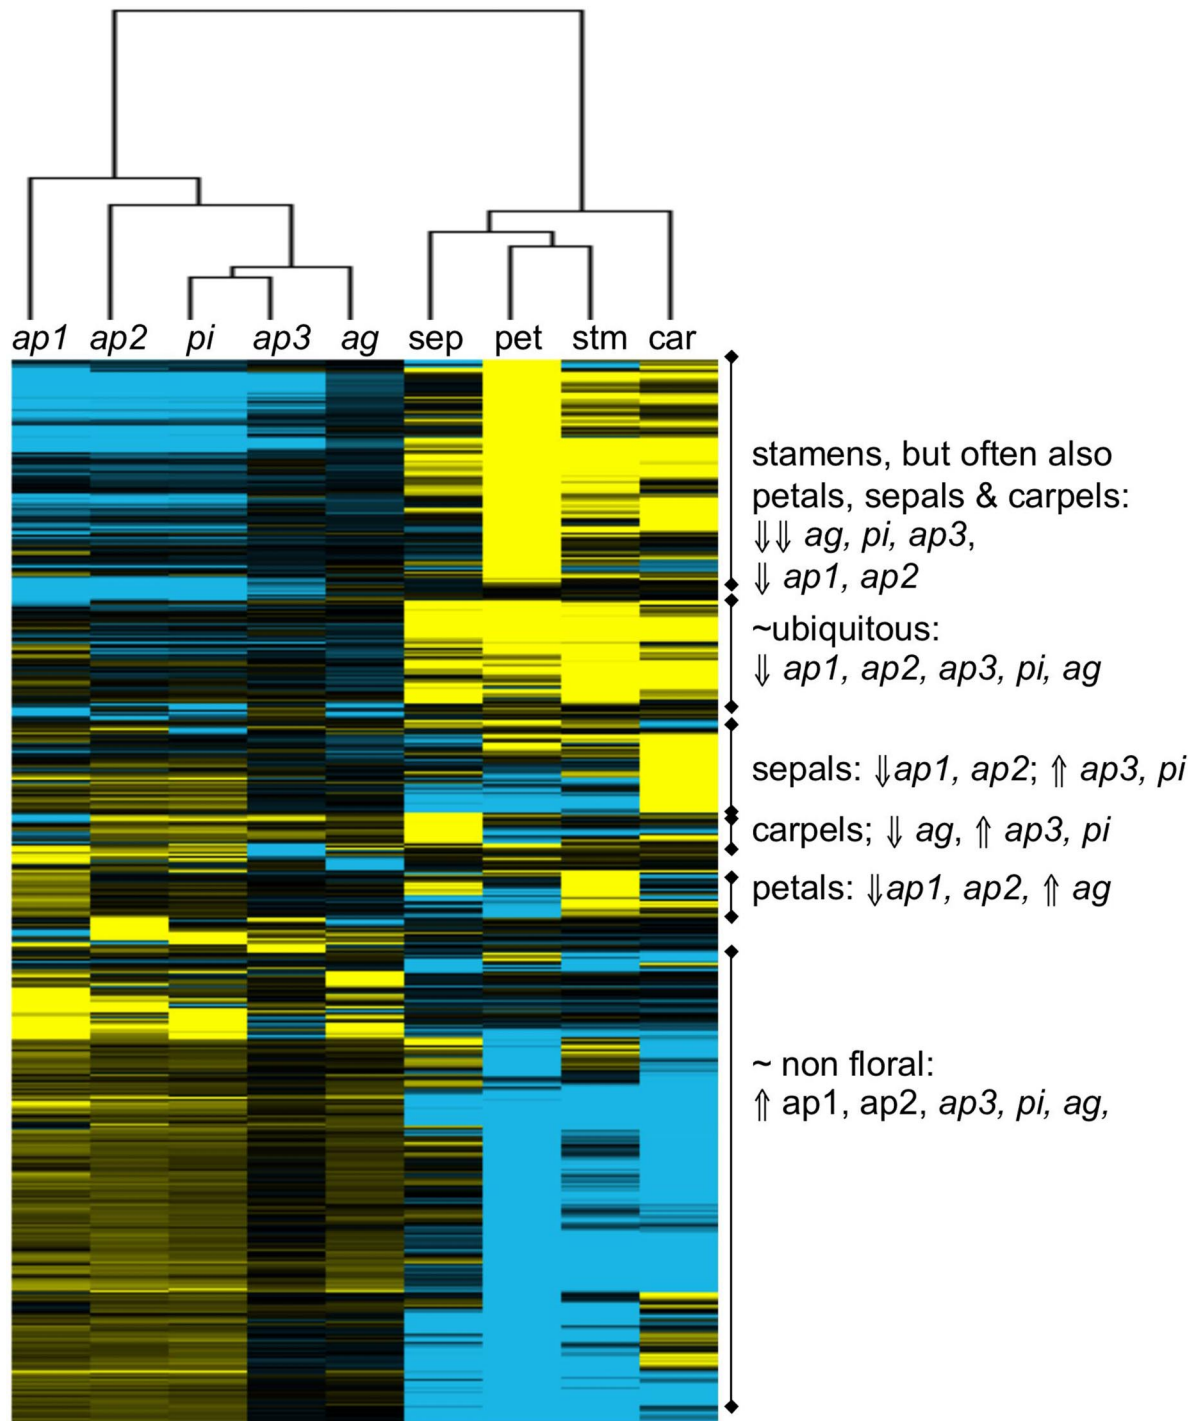

**Fig. S2.** Positive *Arabidopsis* log<sub>2</sub> floral organ/leaf expression ratios map to correspondingly negative log<sub>2</sub> mutant/wild-type expression ratios. The scale of log<sub>2</sub> ratios ranges from saturated yellow (1 and higher = at least 2-fold upregulated) to saturated blue (-1 and lower = at least 2-fold downregulated). The trends in gene expression levels in relevant mutants are given for organ-specific, and other, expression patterns. Data are from the AtGenExpress dataset (1) and from the Wellmer et al. dataset (2).

1. Schmid M, et al. (2005) A gene expression map of *Arabidopsis thaliana* development. *Nat Genet* 37:501-506.
2. Wellmer F, Riechmann JL, Alves-Ferreira M, Meyerowitz EM (2004) Genome-wide analysis of spatial gene expression in *Arabidopsis* flowers. *Plant Cell* 16:1314-1326.

**Table S1. Log<sub>2</sub> floral organ/leaf expression ratios of the MADS domain floral organ identity genes in *Arabidopsis* and *Persea* floral organs**

| MADS domain gene     | <i>Arabidopsis</i> AGI code/ <i>Persea</i><br>GenBank accession no. | Log <sub>2</sub> floral organ/leaf expression ratio |                        |         |         |
|----------------------|---------------------------------------------------------------------|-----------------------------------------------------|------------------------|---------|---------|
|                      |                                                                     | Sepals/outer<br>tepals                              | Petals/inner<br>tepals | Stamens | Carpels |
| <i>AGAMOUS</i>       | At4 g18960                                                          | 0.46                                                | -0.01                  | 7.20    | 5.57    |
| <i>Persea AG.1</i>   | DQ398021                                                            | 1.74                                                | 1.91                   | 5.30    | 6.27    |
| <i>Persea AG.2</i>   | DQ398022                                                            | 1.81                                                | 1.91                   | 2.44    | 3.36    |
| <i>Persea AG.3</i>   | DQ398023                                                            | 0.36                                                | 0.43                   | 2.51    | 4.38    |
| <i>APETALA3</i>      | At3 g54340                                                          | 5.43                                                | 8.83                   | 8.27    | 3.53    |
| <i>Persea AP3</i>    | AY337748                                                            | 8.37                                                | 8.38                   | 7.62    | 5.16    |
| <i>PISTILLATA</i>    | At5 g20240                                                          | 2.71                                                | 8.054                  | 7.13    | -0.93   |
| <i>Persea PI.1</i>   | AY337738                                                            | 6.37                                                | 6.19                   | 6.08    | 1.97    |
| <i>Persea PI.2</i>   | DQ398020                                                            | 4.66                                                | 5.11                   | 5.10    | 0.61    |
| <i>AGL6</i>          | At2 g45650                                                          | 2.04                                                | 3.26                   | 1.23    | 1.68    |
| <i>Persea AGL6.1</i> | DQ660395                                                            | 6.07                                                | 5.94                   | 0.77    | 1.53    |
| <i>Persea AGL6.2</i> | DQ660396                                                            | 6.12                                                | 5.95                   | 0.68    | 1.51    |
| <i>APETALA1</i>      | At1 g69120                                                          | 8.07                                                | 7.76                   | -0.94   | -0.29   |
| <i>Persea AP1</i>    | DQ398015                                                            | 0.66                                                | 0.33                   | -0.71   | -1.13   |

AGI, Arabidopsis Genome Initiative.
